# Supplementary material for: Characterization of Endophytic Bacteria Isolated from Typha latifolia and Their Effect in Plants Exposed to Either Pb or Cd
Source: MDPI journal article supplement (doi:10.3390/plants12030498), 2023-01-21
Supplement: s1 [file s1]

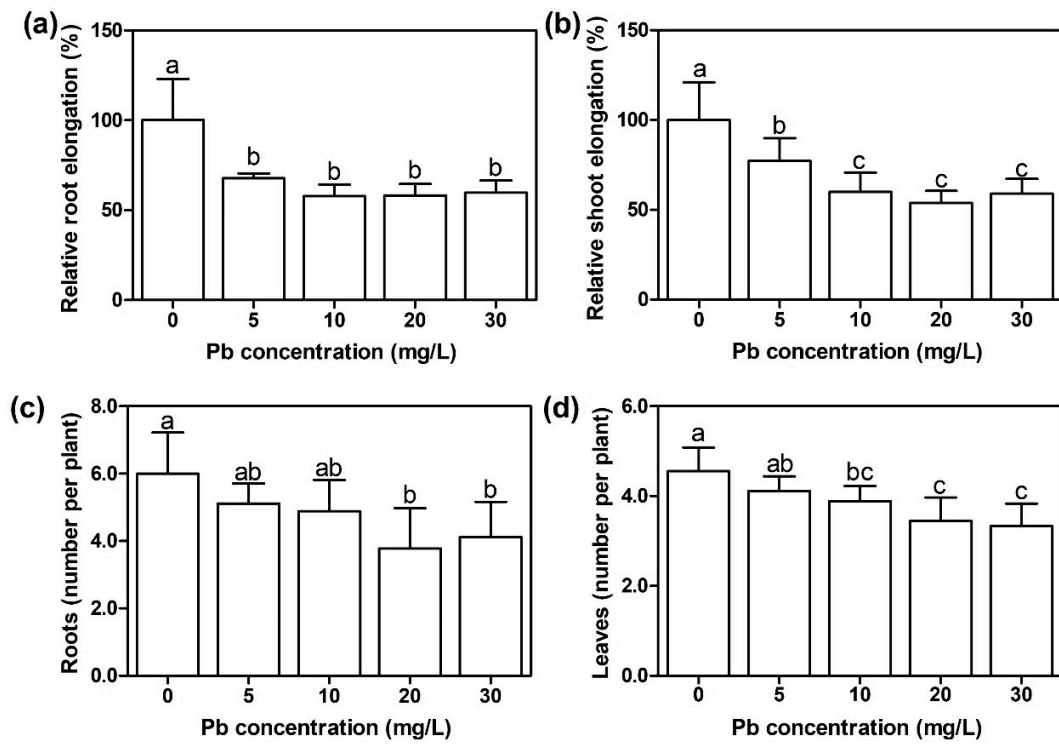

**Figure S1.** Effect of Pb in *T. latifolia* plants. The values represent the mean  $\pm$  SD ( $n = 9$ ). Different letters indicate significant differences between treatments.

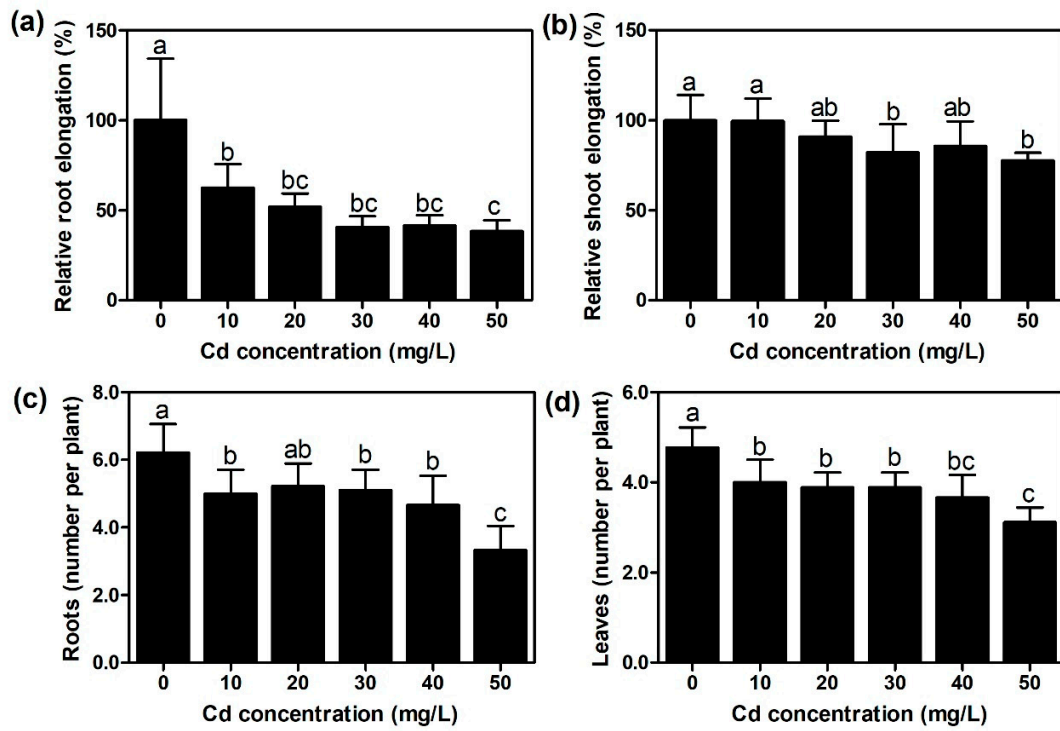

**Figure S2.** Effect of Cd in *T. latifolia* plants. The values represent the mean  $\pm$  SD ( $n = 9$ ). Different letters indicate significant differences between treatments.
